# Supplementary material
Source: PubMed Central journal article supplement (PMC7887857)
Supplement: pt0c00196_si_001.pdf [file pt0c00196_si_001.pdf]

## Supporting information

### Title

Therapeutic assessment of targeting ASNS combined with L-Asparaginase treatment in solid tumors and investigation of resistance mechanisms

### Authors

Verena Apfel<sup>1</sup>, Damien Begue<sup>2</sup>, Valentina Cordo<sup>1,5</sup>, Laura Holzer<sup>1</sup>, Laetitia Martinuzzi<sup>1</sup>, Alexandra Buhles<sup>1</sup>, Grainne Kerr<sup>1</sup>, Ines Barbosa<sup>1</sup>, Ulrike Naumann<sup>2</sup>, Michelle Piquet<sup>3</sup>, David Ruddy<sup>3</sup>, Andreas Weiss<sup>1</sup>, Stephane Ferretti<sup>1</sup>, Reinaldo Almeida<sup>4</sup>, Debora Bonenfant<sup>2,6</sup>, Luca Tordella<sup>1</sup>, Giorgio G. Galli<sup>1,\*</sup>

### Affiliations

<sup>1</sup> Disease area Oncology, Novartis Institute for Biomedical Research, Basel, Switzerland

<sup>2</sup> Analytical Sciences and Imaging, Novartis Institutes for Biomedical Research, Basel, Switzerland

<sup>3</sup> Disease area Oncology, Novartis Institute for Biomedical Research, Cambridge, USA

<sup>4</sup> Global Discovery Chemistry, Novartis Institutes for Biomedical Research, Basel, Switzerland

\* Corresponding author [giorgio.galli@novartis.com](mailto:giorgio.galli@novartis.com)

### Current addresses:

<sup>5</sup> Prinses Maxima Center for Pediatric Oncology, Utrecht, Netherlands

<sup>6</sup> Monte Rosa Therapeutics, Basel, Switzerland

### **Table of contents**

- Page S-2: (Figure S1) Sensitivity of cancer cell lines to ASNS depletion
- Page S-3: (Figure S2) Plasma and tumor levels of Aspartate
- Page S-4: (Figure S3) Additional data for large scale datasets

Figure S1

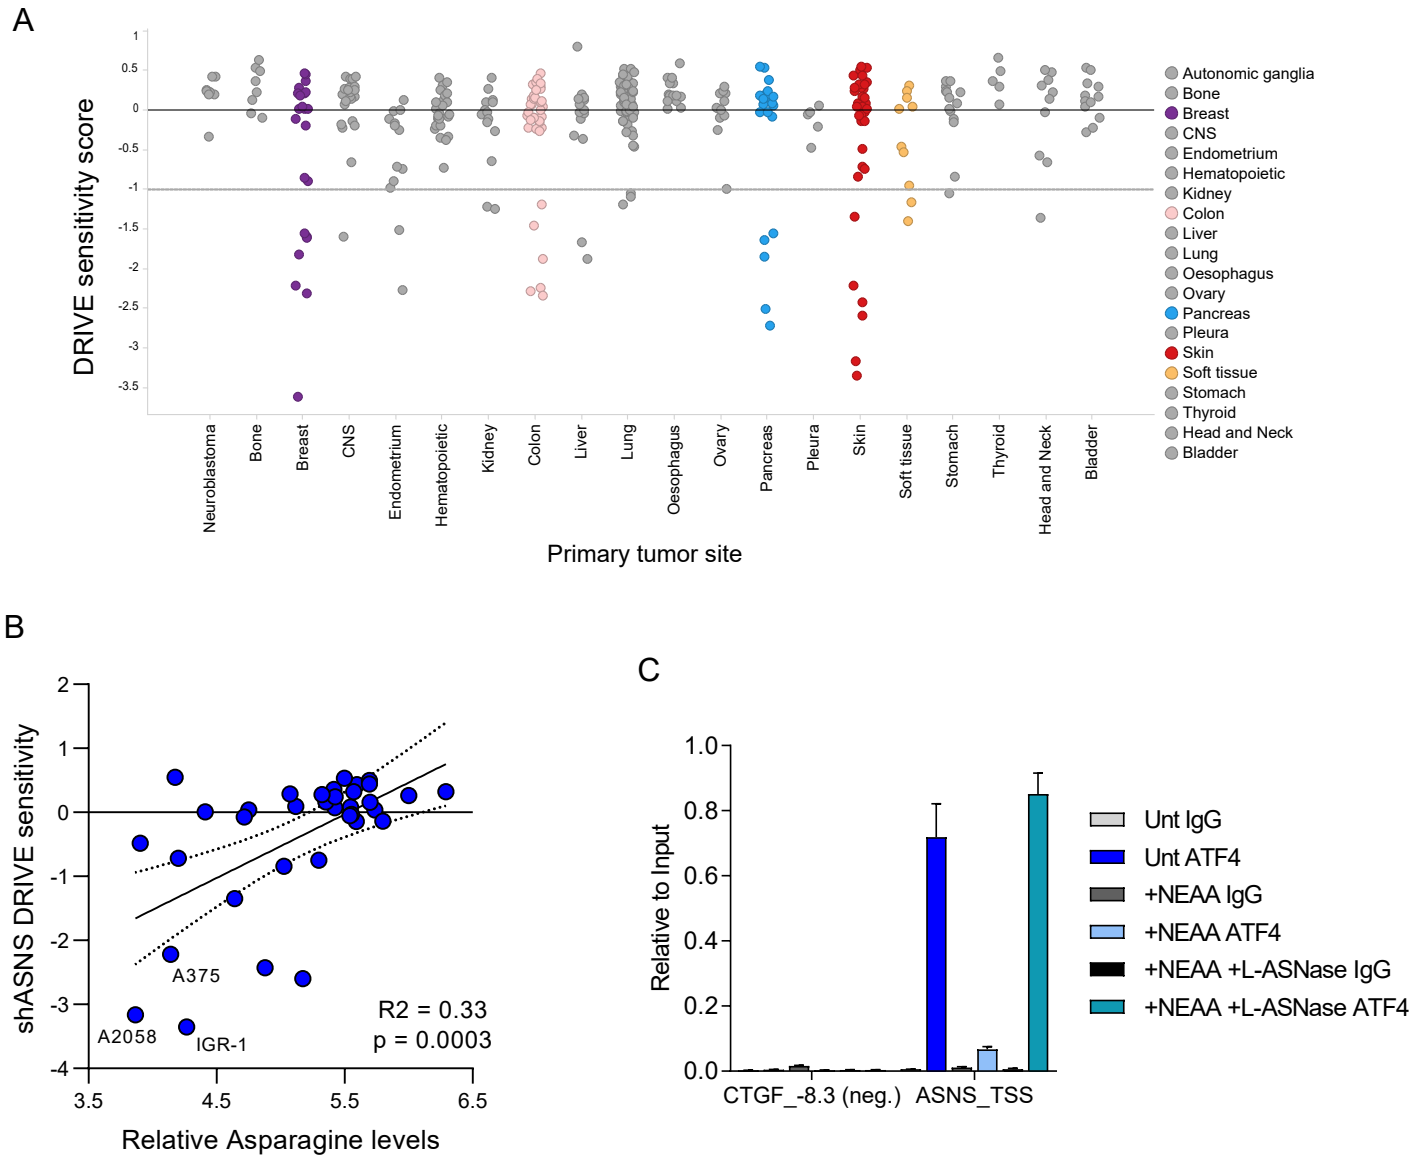

Figure S1. A) Sensitivity score from the DRIVE screen (y-axis) in the panel of cell lines tested binned by cells of origin (x-axis). Horizontal line at -1 represent a threshold of sensitivity as reported in (9). B) Correlation between increased sensitivity to shASNS in melanoma cells according to DRIVE dataset and increasing levels of Asparagine as reported in (7). C) ATF4 Chromatin immunoprecipitation assay on the ASNS promoter in A2058. Cells were grown either in basic media, supplemented with NEAA or by addition of L-ASNase. CTGF-8.3 is used as a negative control region.

Figure S2

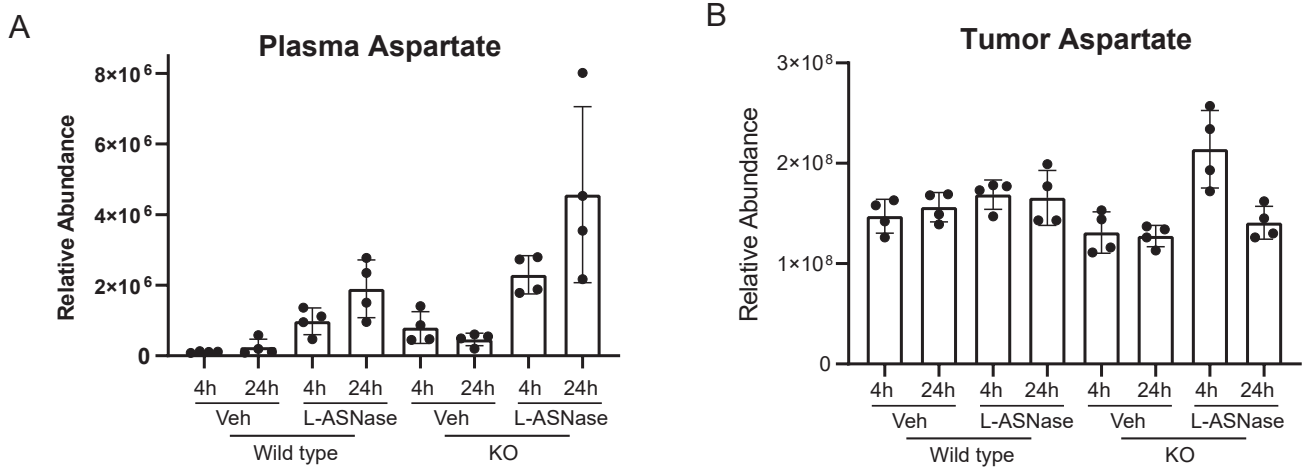

Figure S2. A-B) Relative abundance of Aspartate in plasma (A) and tumors (B) from mice of experiment in Figure 2A at 4h and 24hours after L-asparaginase injection at day 7.

Figure S3

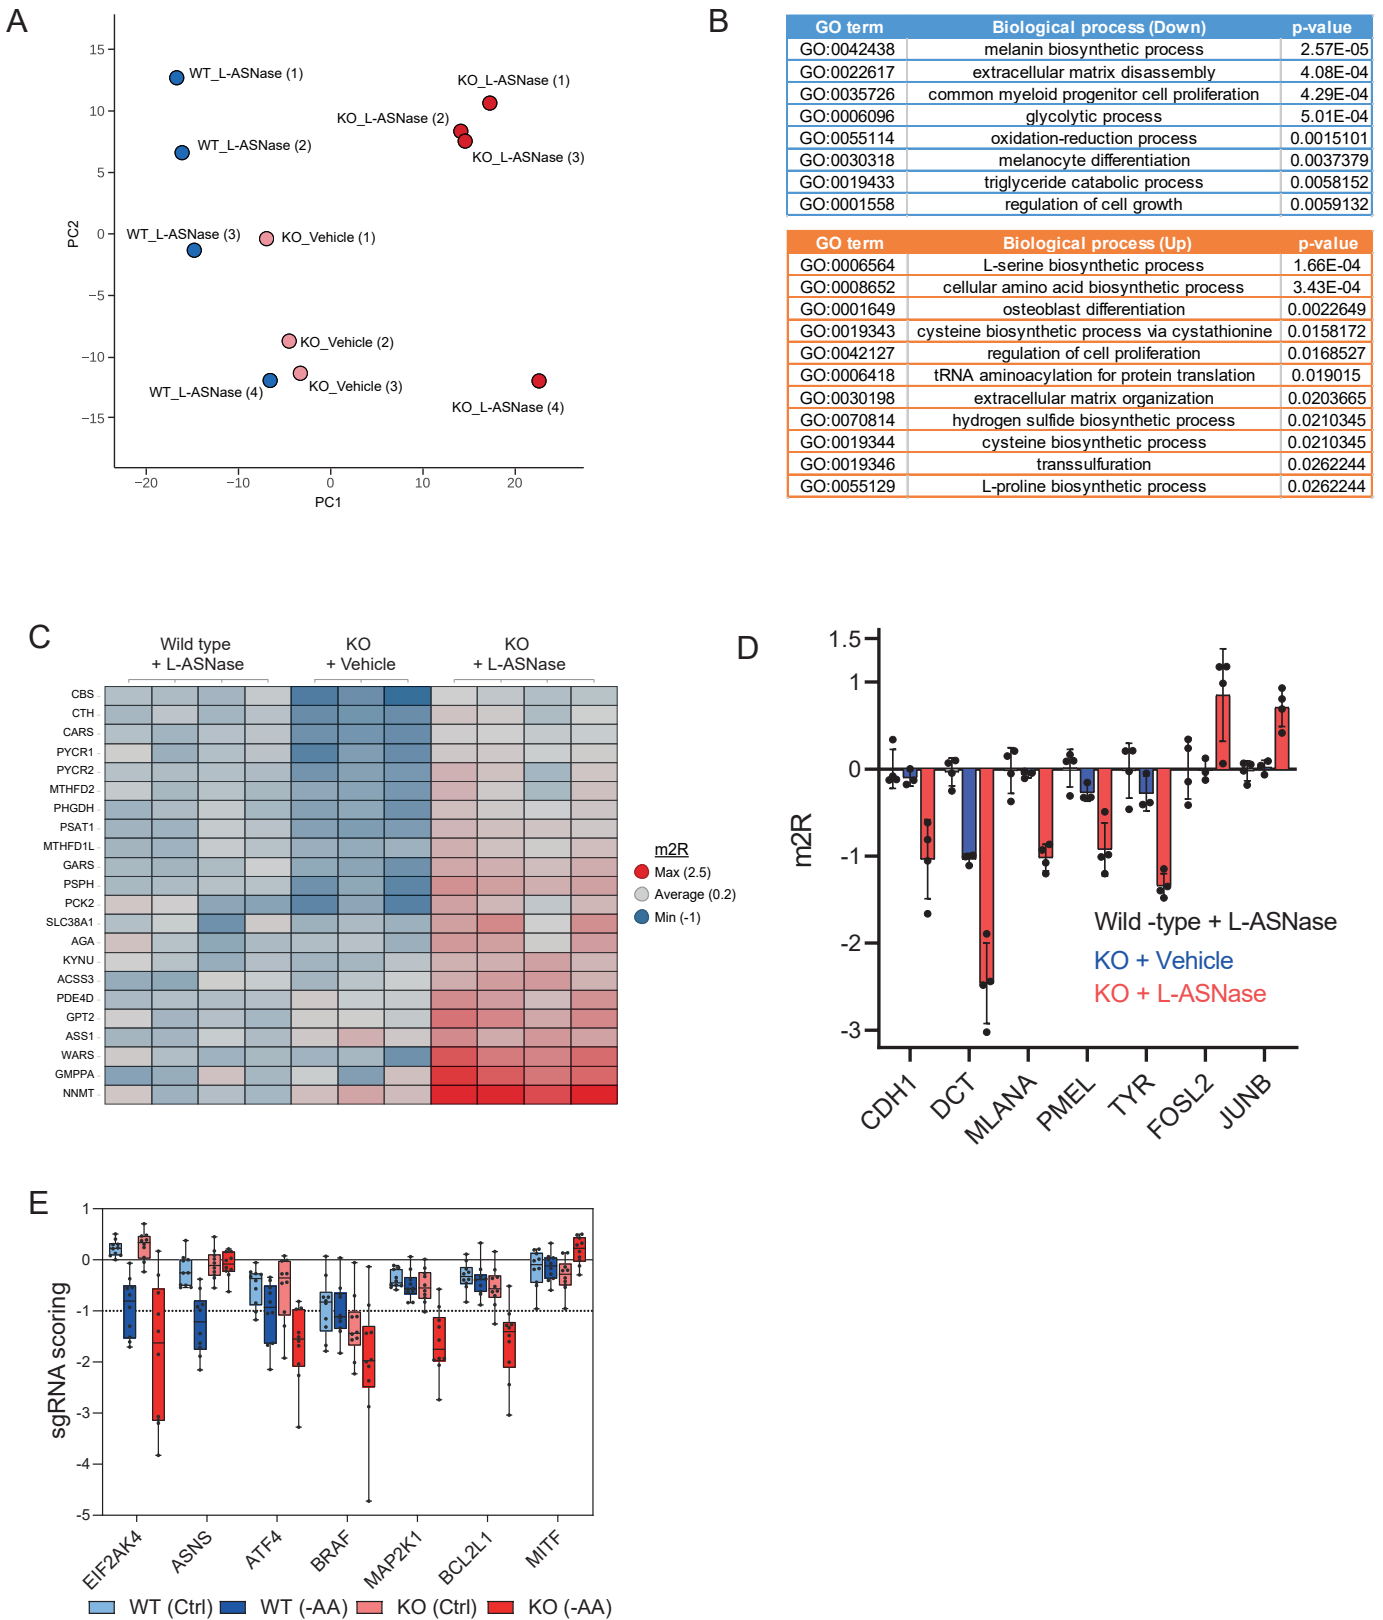

Figure S3. A) PCA plot of the quantitative proteomics data from the analyzed A2058 tumors. Samples are color coded by genotype and treatment. B) Gene Ontology enrichment for proteins differentially expressed in WT and KO tumors treated with L-Asparaginase. C) Heatmap of the proteomics data for differentially expressed proteins involved in metabolic pathways. D) Histogram plot of the proteomics data for proteins involved in melanocyte differentiation (CDH1-TYR) and MAPK (FOSL2 and JUNB). E) sgRNA representation (Y-axis) for the individual sgRNAs targeting hits identified in the CRISPR screen from figure 4A and 4B.
